# Supplementary material for: Effectiveness of Reduced-fluence Photodynamic Therapy for Chronic Central Serous Chorioretinopathy: A Propensity Score Analysis
Source: PubMed Central journal article supplement — Ophthalmol Sci. 2022 Apr 6;2(2):100152. doi: 10.1016/j.xops.2022.100152 (PMC9560560; doi:10.1016/j.xops.2022.100152), 2022-04-06
Supplement: mmc2.pdf [file mmc2.pdf]

**Supplementary Table 1. Visual prognosis of rf-PDT and control groups after IPTW  
(excluding patients who had steroid intake)**

|                                    | PDT group  | Control group | P value |
|------------------------------------|------------|---------------|---------|
| Visual acuity maintenance rate (%) |            |               |         |
| At 12 months                       | 93.5       | 70.4          | <0.001  |
| At 24 months                       | 84.9       | 69.2          | 0.026   |
| Visual acuity change (mean±SE)*    |            |               |         |
| At 12 months                       | -0.07±0.02 | -0.007±0.02   | 0.07    |
| At 24 months                       | -0.06±0.03 | -0.02±0.03    | 0.32    |

\*Visual acuity is presented by logMAR. Weighted mean (weighted standard error) is shown.

rf-PDT: reduced-fluence photodynamic therapy

IPTW: Inverse probability of treatment weighting

SE: standard error
